# Supplementary material for: Integrative In Silico Transcriptomic and Pharmacogenomic Analysis of CD276 as a Candidate Prognostic Biomarker and Therapeutic Target in Bladder Cancer
Source: Research Square preprint supplement (doi:10.21203/rs.3.rs-8563890/v1), 2026-02-02
Supplement: Supplementary file 1 [file f3fb20d3737abee4352fb6bb.docx]

**Supplementary Materials**

Table S1. CD276–immune infiltrate correlations across deconvolution algorithms in TCGA-BLCA (n=406). Values are Spearman’s rho with FDR-adjusted p-values.

| Cell / signature | Algorithm | Spearman rho | FDR (adj. p) |
| --- | --- | --- | --- |
| Macrophage | TIMER | 0.393 | 4.429e-13 |
| T cell CD8+ | TIMER | 0.322 | 1.109e-08 |
| Plasmacytoid dendritic cell | ABIS | 0.310 | 3.340e-08 |
| Myeloid dendritic cell | TIMER | 0.286 | 5.073e-07 |
| Macrophage_CONSENSUS | TME | 0.280 | 7.521e-07 |
| Macrophage M2 | CIBERSORT-ABS | 0.251 | 1.488e-05 |
| Macrophage M1 | QUANTISEQ | 0.243 | 2.689e-05 |
| Macrophage M2_CONSENSUS | TME | 0.224 | 1.411e-04 |
| Neutrophil | TIMER | 0.216 | 2.520e-04 |
| Neutrophil | ABIS | 0.215 | 2.530e-04 |
| Macrophage/Monocyte | MCPCOUNTER | 0.210 | 3.373e-04 |
| Neutrophil | ImmuCellAI | -0.206 | 4.325e-04 |
| Neutrophil_CONSENSUS | TME | 0.204 | 4.980e-04 |
| T cell CD8+ | XCELL | -0.198 | 7.082e-04 |
| Macrophage M0 | CIBERSORT | 0.192 | 1.087e-03 |
| Macrophage | EPIC | 0.191 | 1.138e-03 |
| Macrophage | ImmuCellAI | 0.188 | 1.289e-03 |
| Myeloid dendritic cell_CONSENSUS | TME | 0.187 | 1.378e-03 |
| Macrophage M0 | CIBERSORT-ABS | 0.185 | 1.430e-03 |
| CTL | TIDE | 0.177 | 2.441e-03 |
| NK cell | MCPCOUNTER | 0.174 | 2.967e-03 |
| Macrophage M2 | CIBERSORT | 0.172 | 3.328e-03 |
| Macrophage M2 | QUANTISEQ | 0.152 | 1.192e-02 |
| Macrophage M1 | XCELL | 0.150 | 1.241e-02 |
| MDSC | TIDE | 0.148 | 1.378e-02 |
| Myeloid dendritic cell | ABIS | 0.147 | 1.378e-02 |
| T cell CD8+ central memory | XCELL | -0.145 | 1.527e-02 |
| CD8_T | ImmuCellAI | 0.143 | 1.632e-02 |
| NK cell | ABIS | 0.139 | 2.045e-02 |
| T cell CD8+ naive | XCELL | -0.132 | 2.917e-02 |
| CD8 | TIDE | 0.128 | 3.434e-02 |
| T cell CD8+ | EPIC | -0.118 | 5.757e-02 |
| Myeloid dendritic cell activated | CIBERSORT | -0.116 | 5.943e-02 |
| NKT | ImmuCellAI | 0.116 | 5.943e-02 |
| NK cell | QUANTISEQ | 0.113 | 6.717e-02 |
| NK | ImmuCellAI | 0.110 | 6.901e-02 |
| T cell CD8+ | MCPCOUNTER | 0.110 | 6.901e-02 |
| T cell CD8+ | CIBERSORT | -0.110 | 6.901e-02 |
| NK cell | EPIC | 0.106 | 8.331e-02 |
| Macrophage | XCELL | 0.105 | 8.357e-02 |
| NK cell_CONSENSUS | TME | 0.104 | 8.557e-02 |
| T cell CD8+ | QUANTISEQ | 0.103 | 8.638e-02 |
| Exhausted | ImmuCellAI | 0.103 | 8.638e-02 |
| Myeloid dendritic cell | QUANTISEQ | -0.099 | 1.010e-01 |
| Neutrophil | CIBERSORT-ABS | 0.089 | 1.458e-01 |
| Myeloid dendritic cell activated | CIBERSORT-ABS | -0.089 | 1.467e-01 |
| NK cell activated | CIBERSORT-ABS | 0.084 | 1.694e-01 |
| Macrophage M2 | TIDE | -0.084 | 1.694e-01 |
| CTL.flag | TIDE | 0.084 | 1.694e-01 |
| Neutrophil | CIBERSORT | 0.068 | 2.896e-01 |
| Myeloid dendritic cell | MCPCOUNTER | 0.067 | 2.909e-01 |
| T cell CD8+ memory | ABIS | 0.060 | 3.572e-01 |
| DC | ImmuCellAI | 0.060 | 3.572e-01 |
| Macrophage M1 | CIBERSORT-ABS | 0.059 | 3.607e-01 |
| T cell CD8+_CONSENSUS | TME | 0.055 | 3.954e-01 |
| Myeloid dendritic cell activated | XCELL | 0.054 | 4.022e-01 |
| Neutrophil | MCPCOUNTER | 0.054 | 4.022e-01 |
| CD8_naive | ImmuCellAI | -0.052 | 4.130e-01 |
| Myeloid dendritic cell | XCELL | 0.048 | 4.538e-01 |
| Cytotoxic | ImmuCellAI | -0.046 | 4.734e-01 |
| T cell NK | XCELL | 0.040 | 5.523e-01 |
| T cell CD8+ effector memory | XCELL | -0.035 | 6.043e-01 |
| Neutrophil | XCELL | 0.032 | 6.352e-01 |
| NK cell | XCELL | 0.032 | 6.352e-01 |
| Macrophage M1 | CIBERSORT | 0.031 | 6.393e-01 |
| NK cell resting | CIBERSORT-ABS | 0.026 | 7.008e-01 |
| Myeloid dendritic cell resting | CIBERSORT-ABS | 0.024 | 7.253e-01 |
| Neutrophil | QUANTISEQ | 0.016 | 8.410e-01 |
| T cell CD8+ naive | ABIS | -0.015 | 8.441e-01 |
| NK cell activated | CIBERSORT | 0.010 | 9.043e-01 |
| Plasmacytoid dendritic cell | XCELL | -0.008 | 9.356e-01 |
| T cell CD8+ | CIBERSORT-ABS | 0.007 | 9.385e-01 |
| NK cell resting | CIBERSORT | 0.004 | 9.587e-01 |
| Macrophage M2 | XCELL | -0.003 | 9.746e-01 |
| Myeloid dendritic cell resting | CIBERSORT | 0.001 | 9.881e-01 |
